# Supplementary material
Source: PubMed Central journal article supplement (PMC4008232)
Supplement: imm0142-0248-sd1.pdf [file imm0142-0248-sd1.pdf]

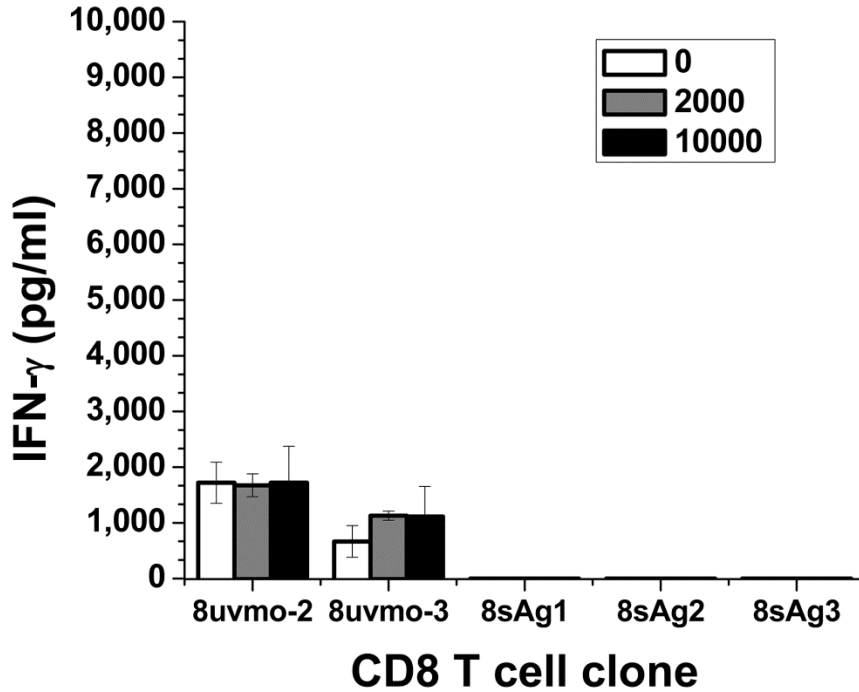

**Supplemental FIG 1.** CD8 T cell clones do not recognize McCoy cell alloantigens. Freeze-thawed McCoy cells, 2000 cells (gray bars) or 10000 cells (black bars), were co-cultured with  $2.5 \times 10^5$  irradiated naïve C57BL/6 splenocytes (1000 rad) and  $2.5 \times 10^4$  T cell clone cells for 72 h in the presence of 1 ng/ml IL-7 (same conditions as mapping experiment in Fig 3) in triplicate wells. IFN- $\gamma$  was quantified by ELISA. Results from wells containing McCoy cells were compared to control wells containing only irradiated splenocytes and T cell clone cells. McCoy alloantigens did not induce IFN- $\gamma$  production by any T cell clone compared to the control wells.
